# Supplementary material for: Frustrated Lewis pairs on pentacoordinated Al3+-enriched Al2O3 promote heterolytic hydrogen activation and hydrogenation
Source: Royal Society of Chemistry journal article supplement (doi:10.1039/d3sc06425e), 2024-01-01
Supplement: d3sc06425e1.pdf [file d3sc06425e1.pdf]

Supporting Information for

**Frustrated Lewis Pairs on Pentacoordinated Al<sup>3+</sup>-Enriched Al<sub>2</sub>O<sub>3</sub> Promote**

**Heterolytic Hydrogen Activation and Hydrogenation**

Qingyuan Wu,<sup>‡ a,b</sup> Ruixuan Qin,<sup>‡ a,c</sup> Mengsi Zhu,<sup>b</sup> Hui Shen,<sup>a</sup> Shenshui Yu,<sup>a</sup> Yuanyuan Zhong,<sup>a</sup> Gang Fu,<sup>a</sup> Xiaodong Yi,<sup>\*,a</sup> and Nanfeng Zheng <sup>\*,a,b</sup>

<sup>a</sup> New Cornerstone Science Laboratory, State Key Laboratory for Physical Chemistry of Solid Surfaces, Collaborative Innovation Center of Chemistry for Energy Materials, and National & Local Joint Engineering Research Center of Preparation Technology of Nanomaterials, College of Chemistry and Chemical Engineering, Xiamen University, Xiamen 361005, China.

<sup>b</sup> Innovation Laboratory for Sciences and Technologies of Energy Materials of Fujian Province (IKKEM), Xiamen 361102, China.

<sup>c</sup> Fujian Key Laboratory of Rare-earth Functional Materials, Fujian Shanghai Collaborative Innovation Center of Rare-earth Functional Materials, Longyan 366300, China.

\*Corresponding author. Email: nfzheng@xmu.edu.cn; Xiaodong Yi: xdyi@xmu.edu.cn.

<sup>‡</sup> These authors contributed equally.

This PDF file includes:

Experimental Section; Figure S1 to S14; Table S1.

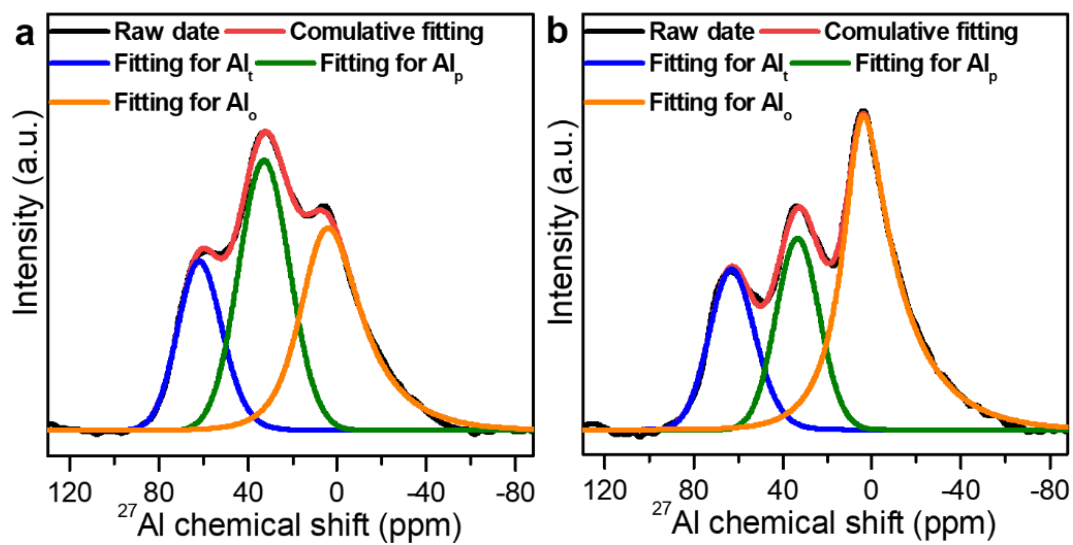

**Figure S1.** Fitting of solid state  $^{27}\text{Al}$  MAS-NMR spectra of  $\text{d-Al}_2\text{O}_3$  (a) and  $\text{NH}_3$  treated  $\text{d-Al}_2\text{O}_3$  (b).

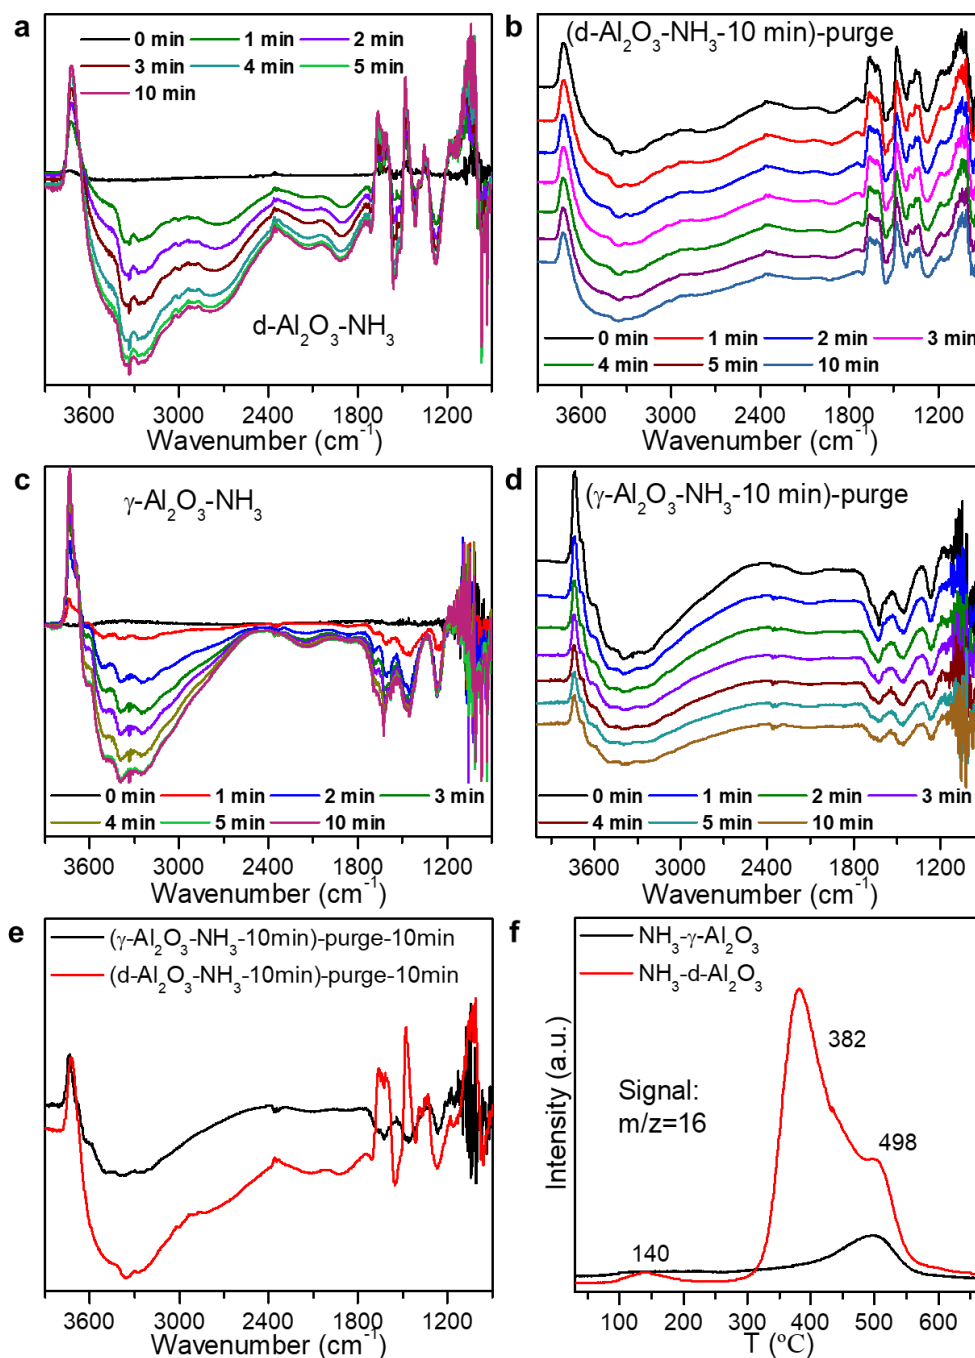

**Figure S2.** (a) *In-situ* NH<sub>3</sub>-FTIR of d-Al<sub>2</sub>O<sub>3</sub> treated with NH<sub>3</sub>. (b) *In-situ* NH<sub>3</sub>-FTIR of d-Al<sub>2</sub>O<sub>3</sub> treated with NH<sub>3</sub> for 10 min and then purged with N<sub>2</sub>. (c) *In-situ* NH<sub>3</sub>-FTIR of γ-Al<sub>2</sub>O<sub>3</sub> treated with NH<sub>3</sub>. (d) *In-situ* NH<sub>3</sub>-FTIR of γ-Al<sub>2</sub>O<sub>3</sub> treated with NH<sub>3</sub> for 10 min and then purged with N<sub>2</sub>. (e) *In-situ* NH<sub>3</sub>-FTIR of d-Al<sub>2</sub>O<sub>3</sub> and γ-Al<sub>2</sub>O<sub>3</sub> treated with NH<sub>3</sub> for 10 min and then purged with N<sub>2</sub> for another 10 min. (f) NH<sub>3</sub>-TPD-MS of d-Al<sub>2</sub>O<sub>3</sub> and γ-Al<sub>2</sub>O<sub>3</sub>.

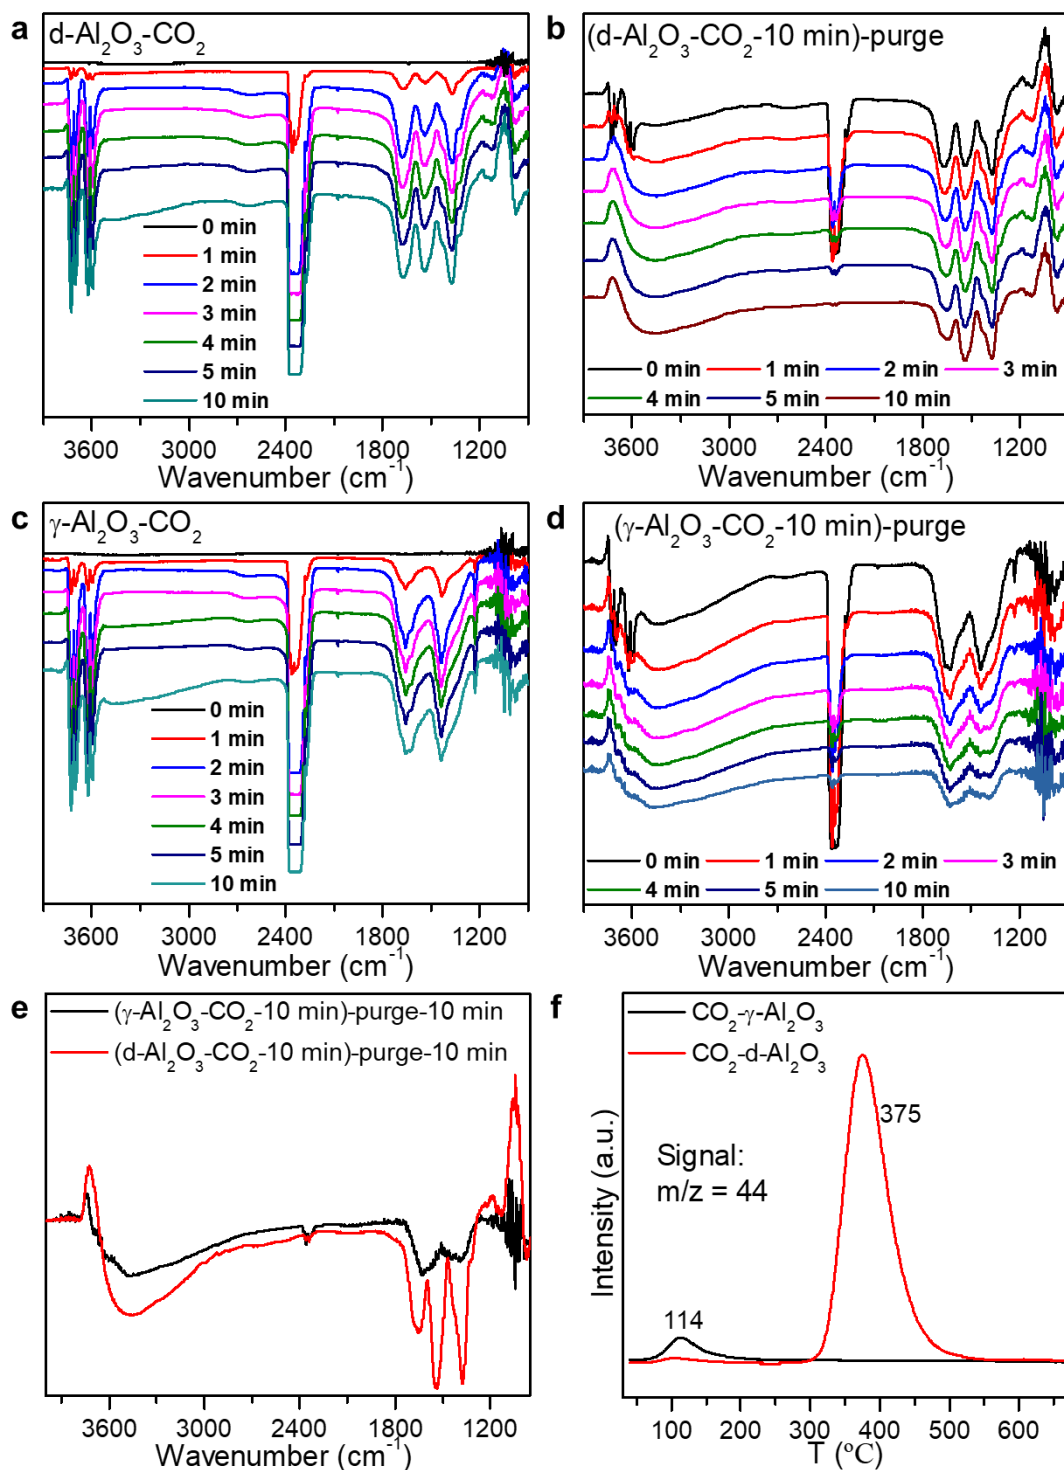

**Figure S3.** (a) *In-situ* CO<sub>2</sub>-FTIR of d-Al<sub>2</sub>O<sub>3</sub> treated with CO<sub>2</sub>. (b) *In-situ* CO<sub>2</sub>-FTIR of d-Al<sub>2</sub>O<sub>3</sub> treated with CO<sub>2</sub> for 10 min and then purged with N<sub>2</sub>. (c) *In-situ* CO<sub>2</sub>-FTIR of γ-Al<sub>2</sub>O<sub>3</sub> treated with CO<sub>2</sub>. (d) *In-situ* CO<sub>2</sub>-FTIR of γ-Al<sub>2</sub>O<sub>3</sub> treated with CO<sub>2</sub> for 10 min and then purged with N<sub>2</sub>. (e) *In-situ* CO<sub>2</sub>-FTIR of d-Al<sub>2</sub>O<sub>3</sub> and γ-Al<sub>2</sub>O<sub>3</sub> treated with CO<sub>2</sub> for 10 min and then purged with N<sub>2</sub> for another 10 min. (f) CO<sub>2</sub>-TPD-MS of d-Al<sub>2</sub>O<sub>3</sub> and γ-Al<sub>2</sub>O<sub>3</sub>.

Al<sub>2</sub>O<sub>3</sub>. *In-situ* CO<sub>2</sub>-FTIR of d-Al<sub>2</sub>O<sub>3</sub> is different from  $\gamma$ -Al<sub>2</sub>O<sub>3</sub>, which varies in adsorption intensity and absorption peak position. Compared to commercial  $\gamma$ -Al<sub>2</sub>O<sub>3</sub>, there are only a few bicarbonate species (1656-1628, 1436 and 1228 cm<sup>-1</sup>) derived from the reaction of CO<sub>2</sub> and -OH on the surface of d-Al<sub>2</sub>O<sub>3</sub>, while a large number of monodentate coordinated carbonate species (1538 and 1370 cm<sup>-1</sup>) derived from the reaction of CO<sub>2</sub> and surface exposure O atom, and bidentate coordinated carbonate species (1670 and 1320 cm<sup>-1</sup>) derived from the reaction of CO<sub>2</sub> with both surface exposed O and Al atom. According to literature reports,<sup>1-2</sup> d-Al<sub>2</sub>O<sub>3</sub> is similar to  $\gamma$ -Al<sub>2</sub>O<sub>3</sub> dehydroxylated at high temperature, containing less surface -OH and more exposed O and Al atom. That is, d-Al<sub>2</sub>O<sub>3</sub> contains rich FLPs.

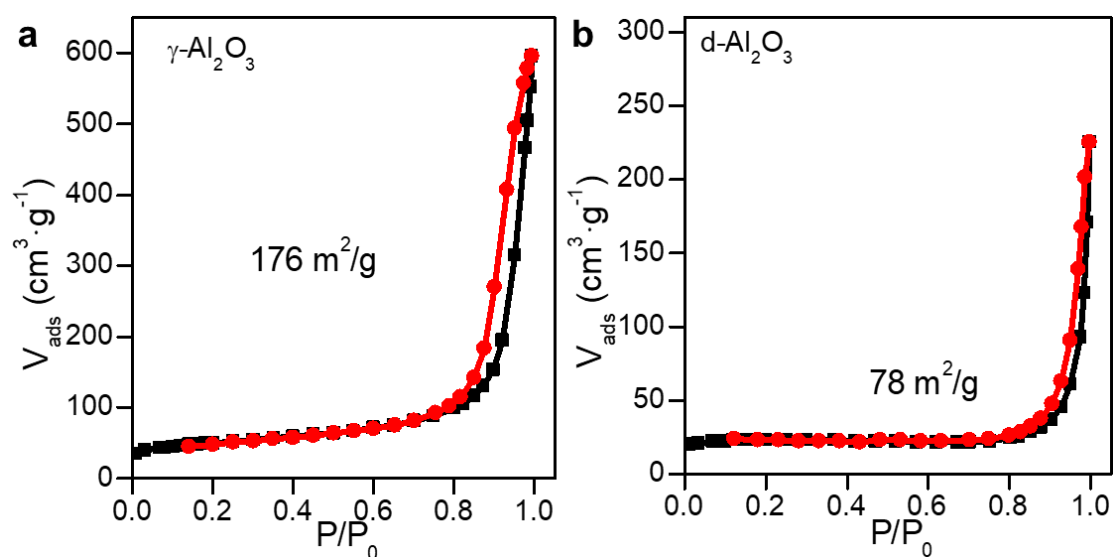

**Figure S4.** N<sub>2</sub> adsorption/desorption isotherm of  $\gamma$ -Al<sub>2</sub>O<sub>3</sub> (a) and d-Al<sub>2</sub>O<sub>3</sub> (b). The specific surface areas of  $\gamma$ -Al<sub>2</sub>O<sub>3</sub> (176 m<sup>2</sup>/g) is higher than that of d-Al<sub>2</sub>O<sub>3</sub> (78 m<sup>2</sup>/g).

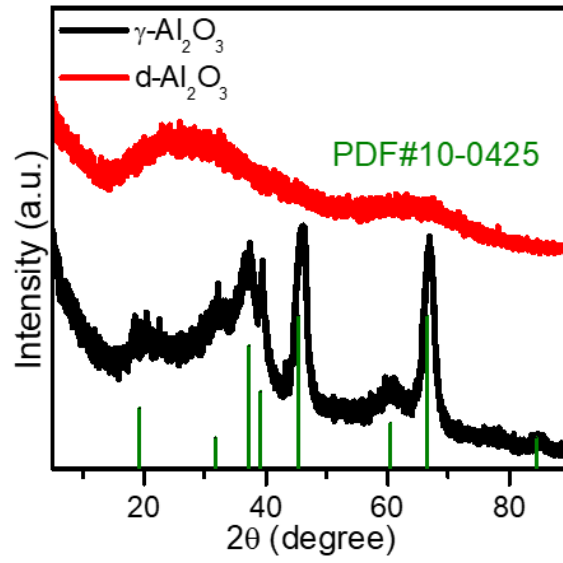

Figure S5. XRD of  $\gamma\text{-Al}_2\text{O}_3$  and  $\text{d-Al}_2\text{O}_3$ .

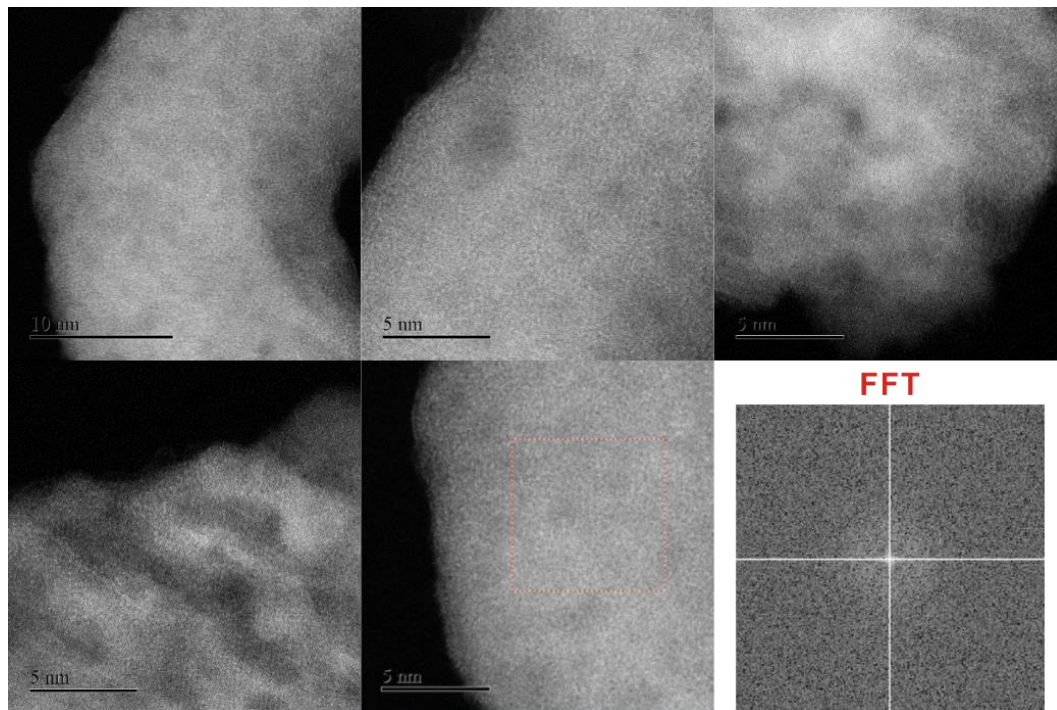

Figure S6. HAADF-STEM images and FFT measurements of  $\text{d-Al}_2\text{O}_3$ .

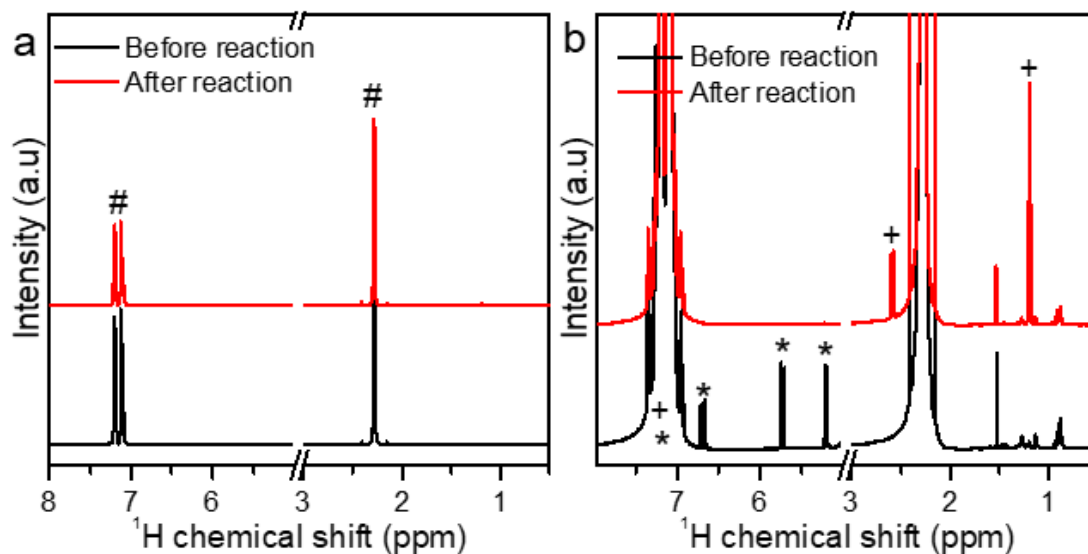

**Figure S7.** (a)  $^1\text{H}$  NMR spectra of  $\text{d-Al}_2\text{O}_3$  catalyzed styrene hydrogenation. (b) Magnified spectra. Before reaction (black trace), only toluene (marked as #) and styrene (marked as \*) were present. After reaction (red trace), only toluene (marked as #) and ethylbenzene (marked as +) were present.

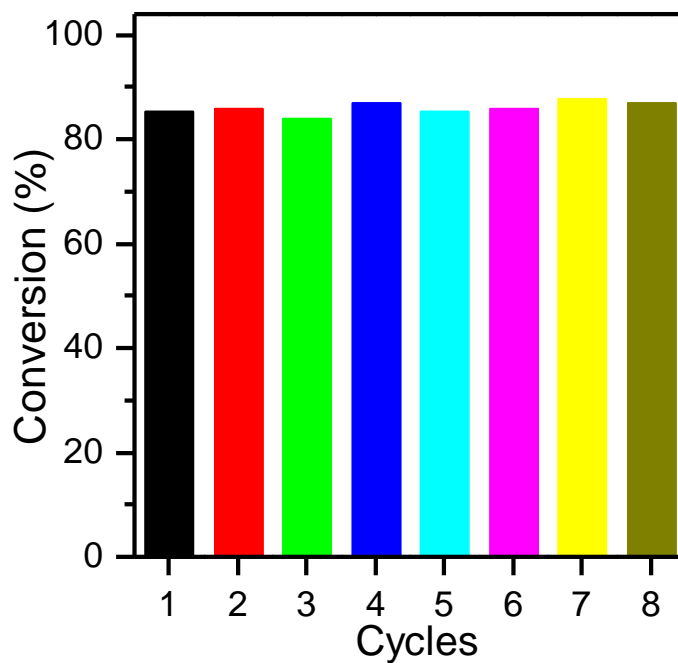

**Figure S8.** Catalytic performances of  $\text{d-Al}_2\text{O}_3$  in styrene hydrogenation for 8 cycles. Reaction time: 150 min

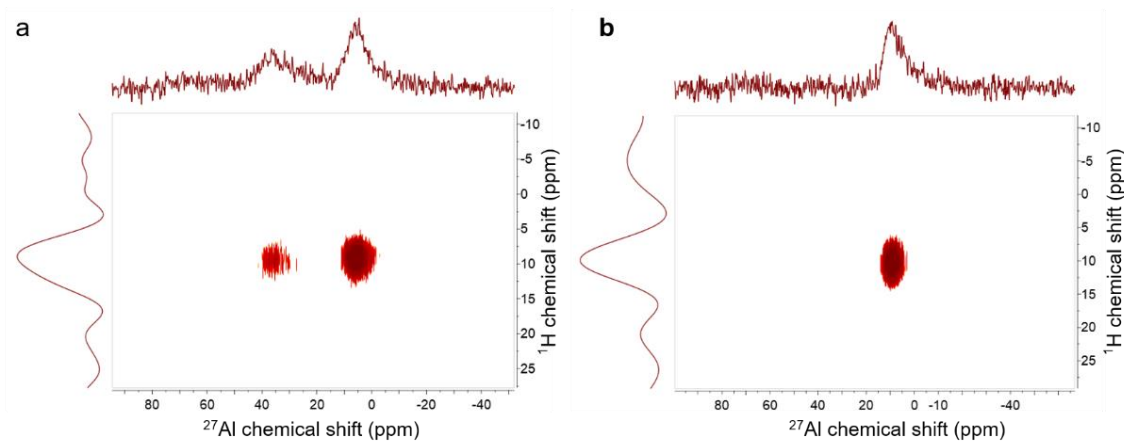

**Figure S9.** 2D solid state  $^1\text{H}$ - $^{27}\text{Al}$  HETCOR experiment of  $\text{H}_2$  treated  $\text{d-Al}_2\text{O}_3$  (a) and  $\gamma\text{-Al}_2\text{O}_3$  (b). Cross correlation peaks between  $\text{Al}_\text{o}$  and H species both on  $\text{H}_2$ -treated  $\text{d-Al}_2\text{O}_3$  and  $\gamma\text{-Al}_2\text{O}_3$  proved the occurrence of H species were very adjacent to  $\text{Al}_\text{o}$  sites with a short CP contact time of  $50\ \mu\text{s}$ . Cross correlation peak between  $\text{Al}_\text{p}$  and H species on  $\text{H}_2$ -treated  $\text{d-Al}_2\text{O}_3$  proved the occurrence of H species were very adjacent to  $\text{Al}_\text{p}$  sites with a short CP contact time of  $50\ \mu\text{s}$ .

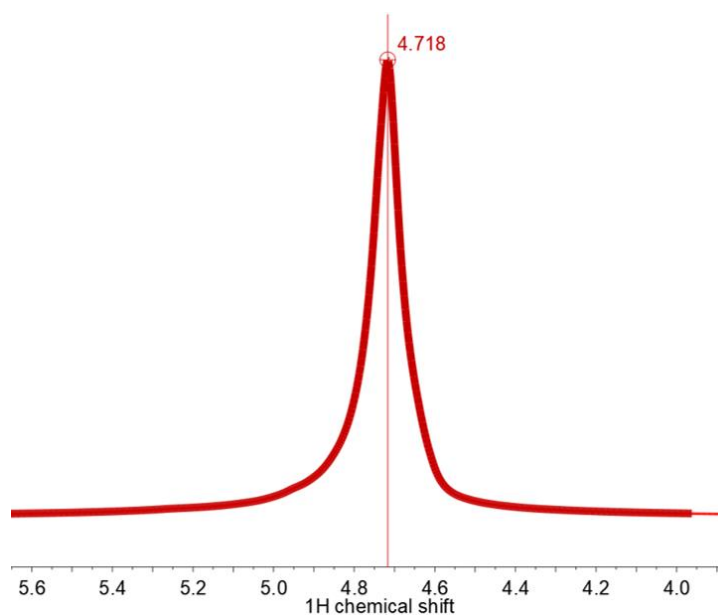

**Figure S10.** Solid state  $^2\text{H}$  MAS-NMR spectra of  $\text{D}_2\text{O}$ .



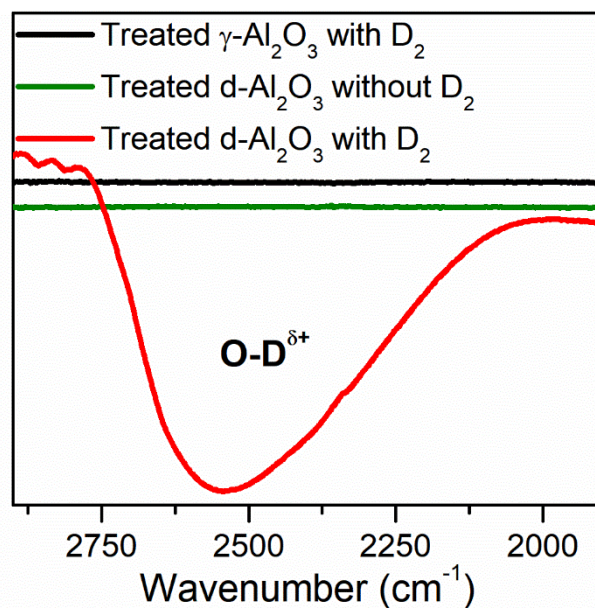

**Figure S11.** *In-situ*  $\text{D}_2$ -FTIR of  $\gamma\text{-Al}_2\text{O}_3$ ,  $\text{d-Al}_2\text{O}_3$  treated without  $\text{D}_2$  and  $\text{d-Al}_2\text{O}_3$  treated with  $\text{D}_2$  at  $100^\circ\text{C}$ .

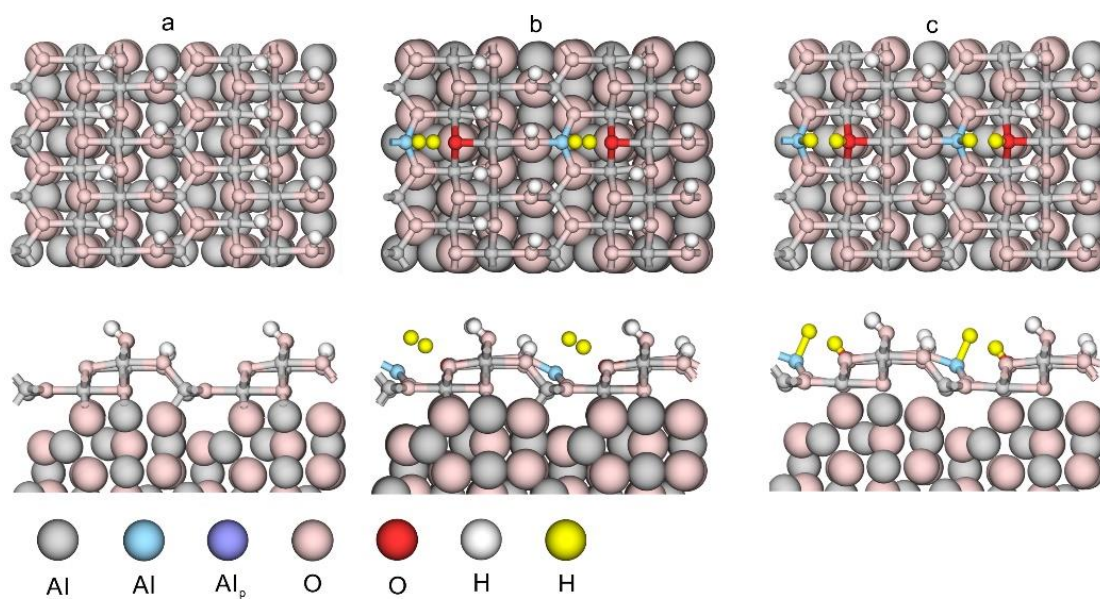

**Figure S12.** Top-view and side-view structures of (a)  $\gamma\text{-Al}_2\text{O}_3$  with exposing (110) facet, transition state (b) and steady state (c) of heterolytic dissociation of  $\text{H}_2$  on  $\gamma\text{-Al}_2\text{O}_3$  with reconstructed surface Al site.

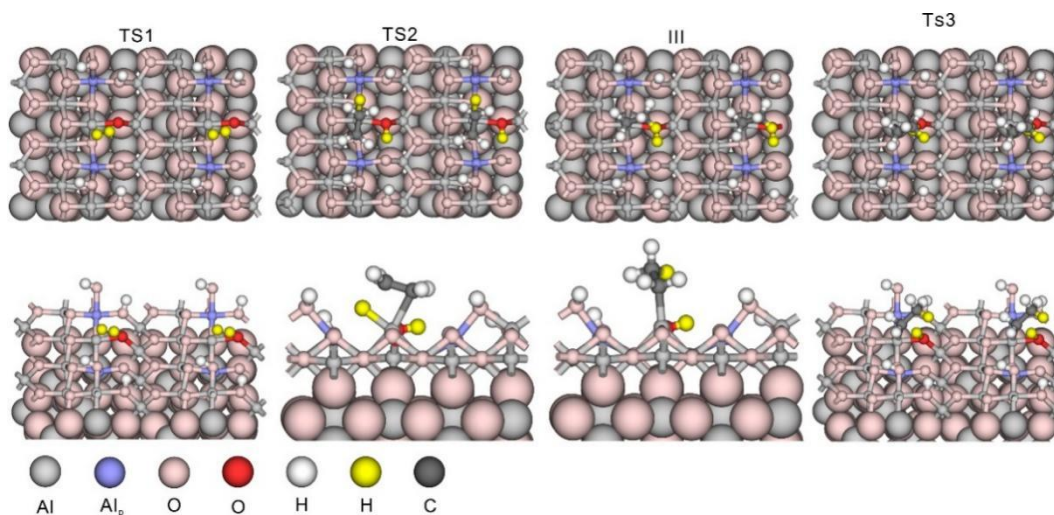

**Figure S13.** Top-view and side-view structures of the transition states (TS1) of heterolytically dissociation of  $\text{H}_2$  on  $\text{d-Al}_2\text{O}_3$ , and transition states (TS2, TS3) and intermediate state (III) involved in  $\text{C}_2\text{H}_4$  hydrogenation.

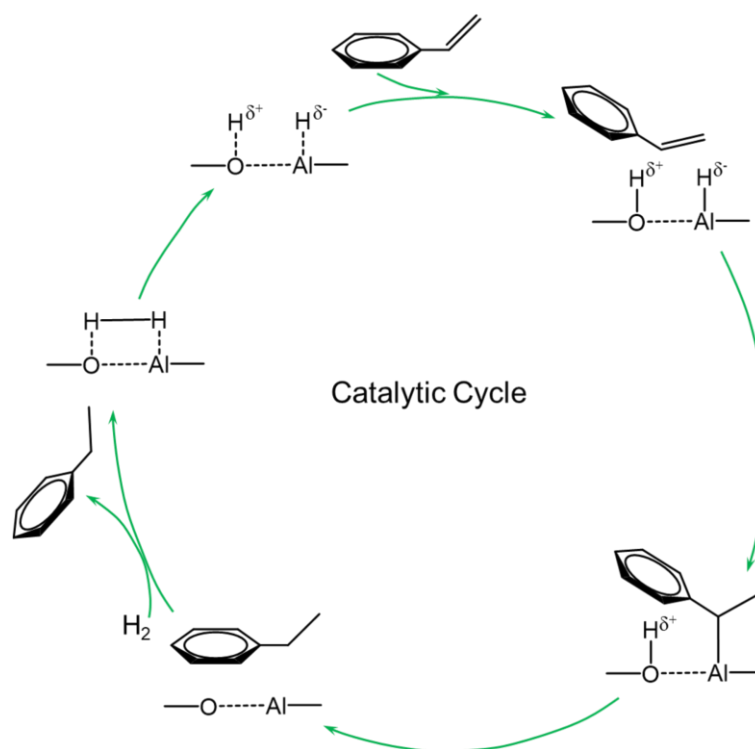

**Figure S14.** Pathways for the catalytic hydrogenation of styrene over FLPs on  $\text{d-Al}_2\text{O}_3$  surface.

**Table S1.**  $^{27}\text{Al}$  MAS NMR peak integration.

| Sample                                    | $\text{Al}_t$ | $\text{Al}_p$ | $\text{Al}_o$ |
|-------------------------------------------|---------------|---------------|---------------|
| d- $\text{Al}_2\text{O}_3$                | 21.6%         | 39.1%         | 39.3%         |
| $\text{NH}_3$ -d- $\text{Al}_2\text{O}_3$ | 21.1%         | 23.8%         | 55.1%         |

## References

- 1 Parkyns, N. D., *J. Phys. Chem.*, 1971, **75**, 526.
- 2 Szanyi, J.; Kwak, J. H., *Phys. Chem. Chem. Phys.*, 2014, **16**, 15117.
